# Supplementary material for: PPARβ/δ-Interfering Peptide Enhanced Mesenchymal Stromal Cell Immunoregulatory Properties
Source: Hindawi journal article supplement (doi:10.1155/2022/5494749), 2022-12-13
Supplement: f1 [file 5494749.f1.pdf]

**PPAR $\beta$ / $\delta$  interfering peptide enhanced mesenchymal stromal  
cell  
immunoregulatory properties**

**Gautier Tejedor<sup>1,2</sup>, Prisca Boisguerin<sup>3</sup>, Éric Vivès<sup>3</sup>, Christian Jorgensen<sup>1,4</sup>, Jérôme Guicheux<sup>5</sup>, Claire Vinatier<sup>5</sup>, Claire Gondeau<sup>2</sup> and Farida Djouad<sup>1\*</sup>**

<sup>1</sup>IRMB, Univ Montpellier, INSERM, Montpellier, France; <sup>2</sup>MedXCell Science SAS, Montpellier, France; <sup>3</sup>PhyMedExp, Univ Montpellier, INSERM, CNRS, Montpellier, France; <sup>4</sup>CHU Montpellier, Montpellier, F-34295, France; <sup>5</sup>Nantes Université, Oniris, CHU Nantes, INSERM, Regenerative Medicine and Skeleton, RMeS, UMR 1229, F-44000 Nantes, France.

*Corresponding author:*

Farida Djouad, Inserm U 1183, IRMB, Hôpital Saint-Eloi, 80 avenue Augustin Fliche, 34295 Montpellier cedex 5, France. Tel: 33 (0) 4 67 33 04 75 – Fax: 33 (0) 4 67 33 01

13 –

E-mail: [farida.djouad@inserm.fr](mailto:farida.djouad@inserm.fr)

**Table S1: Sequences of the TF65 PepScan with the corresponding signal intensities (SI)**

| Spot Nb | Sequences       | Signal intensities |
|---------|-----------------|--------------------|
| 1       | MDELFPLIFPAEPAQ | 4,353              |
| 2       | LFPLIFPAEPAQASG | 65,903             |
| 3       | LIFPAEPAQASGPYV | 3,555              |
| 4       | PAEPAQASGPYVEII | 2,851              |
| 5       | PAQASGPYVEIIEQP | 3,862              |
| 6       | ASGPYVEIIEQPKQR | 22,805             |
| 7       | PYVEIIEQPKQRGMR | <b>172,781</b>     |
| 8       | EIIEQPKQRGMRFRY | <b>126,029</b>     |
| 9       | EQPKQRGMRFRYKCE | <b>102,462</b>     |
| 10      | KQRGMRFRYKCEGRS | <b>149,432</b>     |
| 11      | GMRFRYKCEGRSAGS | 41,231             |
| 12      | FRYKCEGRSAGSIPG | 31,791             |
| 13      | KCEGRSAGSIPGERS | 3,087              |
| 14      | GRSAGSIPGERSTDT | 2,736              |
| 15      | AGSIPGERSTDTTKT | 1,707              |
| 16      | IPGERSTDTTKTHPT | 14,576             |
| 17      | ERSTDTTKTHPTIKI | 13,651             |
| 18      | TDTTKTHPTIKINGY | 6,289              |
| 19      | TKTHPTIKINGYTGP | 41,083             |
| 20      | HPTIKINGYTGPGTV | 27,921             |
| 21      | IKINGYTGPGTVRIS | <b>153,746</b>     |
| 22      | NGYTGPGTVRISLVT | 8,574              |
| 23      | TGPGTVRISLVTKDP | 19,980             |
| 24      | GTVRISLVTKDPPHR | <b>132,841</b>     |
| 25      | RISLVTKDPPHRPHP | <b>171,742</b>     |
| 26      | LVTKDPPHRPHPHEL | 45,465             |
| 27      | KDPPHRPHPHELVGK | 4,974              |
| 28      | PHRPHPHELVGKDCR | 1,439              |
| 29      | PHPHELVGKDCRDGF | 1,667              |
| 30      | HELVGKDCRDGFYEA | 2,013              |
| 31      | VGKDCRDGFYEAELC | 1,368              |
| 32      | DCRDGFYEAELCPDR | 2,362              |
| 33      | DGFYEAELCPDRCIH | 2,913              |
| 34      | YEAELCPDRCIHSFQ | 2,781              |
| 35      | ELCPDRCIHSFQNLG | 3,358              |
| 36      | PDRCIHSFQNLGIQC | 8,220              |
| 37      | CIHSFQNLGIQCVKK | 97,412             |
| 38      | SFQNLGIQCVKKRDL | <b>125,671</b>     |
| 39      | NLGIQCVKKRDLEQA | 44,329             |
| 40      | IQCCKRDLEQAISQ  | 41,916             |
| 41      | VKKRDLEQAISQRIQ | <b>119,520</b>     |
| 42      | RDLEQAISQRIQTNN | 9,120              |
| 43      | EQAISQRIQTNNNPF | 2,739              |
| 44      | ISQRIQTNNNPFQVP | 56,351             |
| 45      | RIQTNNNPFQVPIEE | 2,714              |

|    |                 |                |
|----|-----------------|----------------|
| 46 | TNNNPFQVPIEEQRG | 1,902          |
| 47 | NPFQVPIEEQRGDYD | 3,205          |
| 48 | QVPIEEQRGDYDLNA | 4,210          |
| 49 | IEEQRGDYDLNAVRL | 8,865          |
| 50 | QRGDYDLNAVRLCFQ | 6,172          |
| 51 | DYDLNAVRLCFQVTV | 2,620          |
| 52 | LNAVRLCFQVTVRDP | 5,232          |
| 53 | VRLCFQVTVRDPGR  | 25,723         |
| 54 | CFQVTVRDPGRPLR  | 22,699         |
| 55 | VTVRDPGRPLRLPP  | 98,511         |
| 56 | RDPGRPLRLPPVLS  | 13,034         |
| 57 | SGRPLRLPPVLSHPI | 6,777          |
| 58 | PLRLPPVLSHPIFDN | 21,146         |
| 59 | LPPVLSHPIFDNRAP | 13,636         |
| 60 | VLSHPIFDNRAPNTA | 6,045          |
| 61 | HPIFDNRAPNTAELK | 3,015          |
| 62 | FDNRAPNTAELKICR | 21,888         |
| 63 | RAPNTAELKICRVNR | <b>105,962</b> |
| 64 | NTAELKICRVNRNSG | 37,451         |
| 65 | ELKICRVNRNSGSCL | 22,405         |
| 66 | ICRVNRNSGSCLGGD | 18,298         |
| 67 | VNRNSGSCLGGDEIF | 3,582          |
| 68 | NSGSCLGGDEIFLLC | 3,439          |
| 69 | SCLGGDEIFLLCDKV | 5,623          |
| 70 | GGDEIFLLCDKVQKE | 6,379          |
| 71 | EIFLLCDKVQKEDIE | 19,211         |
| 72 | LLCDKVQKEDIEVYF | 6,455          |
| 73 | DKVQKEDIEVYFTGP | 3,630          |
| 74 | QKEDIEVYFTGPGWE | 3,139          |
| 75 | DIEVYFTGPGWEARG | 3,309          |
| 76 | VYFTGPGWEARGSFS | 13,971         |
| 77 | TGPGWEARGSFSQAD | 2,549          |
| 78 | GWEARGSFSQADVHR | 6,064          |
| 79 | ARGSFSQADVHRQVA | 64,035         |
| 80 | SFSQADVHRQVAIVF | 5,493          |
| 81 | QADVHRQVAIVFRTP | 3,797          |
| 82 | VHRQVAIVFRTPPYA | 7,981          |
| 83 | QVAIVFRTPPYADPS | 4,635          |
| 84 | IVFRTPPYADPSLQA | 42,450         |
| 85 | RTPPYADPSLQAPVR | 11,722         |
| 86 | PYADPSLQAPVRVSM | 4,754          |
| 87 | DPSLQAPVRVSMQLR | 31,549         |
| 88 | LQAPVRVSMQLRRPS | 40,550         |
| 89 | PVRVSMQLRRPSDRE | 43,443         |
| 90 | VSMQLRRPSDRELSE | 3,108          |
| 91 | QLRRPSDRELSEPME | 2,219          |
| 92 | RPSDRELSEPMEFQY | 2,367          |
| 93 | DRELSEPMEFQYLPD | 2,733          |

|     |                  |                |
|-----|------------------|----------------|
| 94  | LSEPMEFQYLPDTDD  | 2,280          |
| 95  | PMEFQYLPDTDDRHR  | 3,852          |
| 96  | FQYLPDTDDRHRIEE  | 3,901          |
| 97  | LPDTDDRHRIEEKRK  | 4,206          |
| 98  | TDDRHRIEEKRKRTY  | 56,552         |
| 99  | RHRIEEKRKRTYETF  | 32,050         |
| 100 | IEEKRKRTYETFKSI  | 48,995         |
| 101 | KRKRTYETFKSIMKK  | <b>148,090</b> |
| 102 | RTYETFKSIMKKSFP  | 68,598         |
| 103 | ETFKSIMKKSFPSPG  | 85,420         |
| 104 | KSIMKKSFPSPGPTD  | 81,525         |
| 105 | MKKSFPSPGPTDPRPP | 3,032          |
| 106 | SPSPGPTDPRPPRR   | <b>137,061</b> |
| 107 | SGPTDPRPPRRRIAV  | 88,447         |
| 108 | TDPRPPRRRIAVPSR  | <b>117,857</b> |
| 109 | RPPRRRIAVPSRSSA  | 84,283         |
| 110 | PRRIAVPSRSSASVP  | 64,694         |
| 111 | IAVPSRSSASVPKPA  | 81,654         |
| 112 | PSRSSASVPKPAPQP  | 54,794         |
| 113 | SSASVPKPAPQYPF   | 4,471          |
| 114 | SVPKPAPQYPFTSS   | 6,561          |
| 115 | KPAPQYPFTSSLST   | 59,678         |
| 116 | PQYPFTSSLSTINY   | 30,876         |
| 117 | YPFTSSLSTINYDEF  | 29,641         |
| 118 | TSSLSTINYDEFPTM  | 41,159         |
| 119 | LSTINYDEFPTMVFP  | 44,899         |
| 120 | INYDEFPTMVFPSPGQ | 2,707          |
| 121 | DEFPTMVFPSPGQISQ | 2,781          |
| 122 | PTMVFPSPGQISQASA | 3,956          |
| 123 | VFSPGQISQASALAP  | 10,428         |
| 124 | SGQISQASALAPAPP  | 3,443          |
| 125 | ISQASALAPAPPQVL  | 2,435          |
| 126 | ASALAPAPPQVLPQA  | 2,011          |
| 127 | LAPAPPQVLPQAPAP  | 1,445          |
| 128 | APPQVLPQAPAPAPA  | 1,462          |
| 129 | QVLPQAPAPAPAPAM  | 2,902          |
| 130 | PQAPAPAPAPAMVSA  | 2,756          |
| 131 | PAPAPAPAMVSALAQ  | 2,777          |
| 132 | APAPAMVSALAQAPA  | 4,802          |
| 133 | PAMVSALAQAPAPVP  | 12,659         |
| 134 | VSALAQAPAPVPVLA  | 5,824          |
| 135 | LAQAPAPVPVLAPGP  | 2,657          |
| 136 | APAPVPVLAPGPPQA  | 2,539          |
| 137 | PVPVLAPGPPQAVAP  | 2,182          |
| 138 | VLAPGPPQAVAPPAP  | 2,866          |
| 139 | PGPPQAVAPPAPKPT  | 3,016          |
| 140 | PQAVAPPAPKPTQAG  | 2,671          |
| 141 | VAPPAPKPTQAGEGT  | 1,559          |

|            |                  |        |
|------------|------------------|--------|
| <b>142</b> | PAPKPTQAGEGTLSE  | 916    |
| <b>143</b> | KPTQAGEGTLSEALL  | 1,205  |
| <b>144</b> | QAGEGTLSEALLQLQ  | 1,177  |
| <b>145</b> | EGTLSEALLQLQFDD  | 676    |
| <b>146</b> | LSEALLQLQFDDIDL  | 492    |
| <b>147</b> | ALLQLQFDDIDLGAL  | 384    |
| <b>148</b> | QLQFDDIDLGALLGN  | 965    |
| <b>149</b> | FDDIDLGALLGNSTD  | 801    |
| <b>150</b> | EDLGALLGNSTDPVAV | 1,449  |
| <b>151</b> | GALLGNSTDPVAVFTD | 1,042  |
| <b>152</b> | LGNSTDPVAVFTDLAS | 614    |
| <b>153</b> | STDPVAVFTDLASVDN | 1,054  |
| <b>154</b> | PAVFTDLASVDNSEF  | 1,019  |
| <b>155</b> | FTDLASVDNSEFQQL  | 1,031  |
| <b>156</b> | LASVDNSEFQQLLNQ  | 1,528  |
| <b>157</b> | VDNSEFQQLLNQGI P | 1,097  |
| <b>158</b> | SEFQQLLNQGI PVAP | 2,355  |
| <b>159</b> | QQLLNQGI PVAPHTT | 1,052  |
| <b>160</b> | LNQGI PVAPHTTEPM | 841    |
| <b>161</b> | GIPVAPHTTEPMLME  | 696    |
| <b>162</b> | VAPHTTEPMLMEYPE  | 317    |
| <b>163</b> | HTTEPMLMEYPEAIT  | 589    |
| <b>164</b> | EPMLMEYPEAITRLV  | 952    |
| <b>165</b> | LMEYPEAITRLVTGA  | 16,075 |
| <b>166</b> | YPEAITRLVTGAQRP  | 31,436 |
| <b>167</b> | AITRLVTGAQRPPDP  | 1507   |
| <b>168</b> | RLVTGAQRPPDPAPA  | 20,988 |
| <b>169</b> | TGAQRPPDPAPAPLG  | 641    |
| <b>170</b> | QRPPDPAPAPLGAPG  | 1,592  |
| <b>171</b> | PDPAPAPLGAPGLPN  | 1,789  |
| <b>172</b> | APAPLGAPGLPNGLL  | 2,138  |
| <b>173</b> | PLGAPGLPNGLLSGD  | 9,475  |
| <b>174</b> | APGLPNGLLSGDEDF  | 1,127  |
| <b>175</b> | LPNGLLSGDEDFSSI  | 908    |
| <b>176</b> | GLLSGDEDFSSIADM  | 972    |
| <b>177</b> | SGDEDFSSIADMDFS  | 1,095  |
| <b>178</b> | EDFSSIADMDFSALL  | 1,079  |
| <b>179</b> | SSIADMDFSALLSQI  | 3,301  |

*Footnote S1: The signal intensities were measured using the macro “Protein Array Analyzer” from Image J. The measured values ranged between 174,660 and 1,368 and the threshold was set at 100,000 to determine the “binders” (highlighted in bold).*

**Table S2: Sequences of the length analysis of the peptide GTVRISLVTKDPPHRPHP (spot 24-25 of Table S1) with the corresponding signal intensities.**

| Spot      | Sequences          | Signal intensities |
|-----------|--------------------|--------------------|
| <b>1</b>  | GTVRISLVTKDPPHRPHP | <b>163,329</b>     |
| <b>2</b>  | GTVRISLVTKDPPHRPHP | <b>155,341</b>     |
| <b>3</b>  | TVRISLVTKDPPHRPHP  | <b>176,564</b>     |
| <b>4</b>  | GTVRISLVTKDPPHRPH  | 97,625             |
| <b>5</b>  | VRISLVTKDPPHRPHP   | <b>154,344</b>     |
| <b>6</b>  | GTVRISLVTKDPPHRP   | 12,406             |
| <b>7</b>  | RISLVTKDPPHRPHP    | 80,358             |
| <b>8</b>  | GTVRISLVTKDPPHR    | 204,526            |
| <b>9</b>  | ISLVTKDPPHRPHP     | 13,386             |
| <b>10</b> | GTVRISLVTKDPPH     | 7,567              |
| <b>11</b> | SLVTKDPPHRPHP      | 6,839              |
| <b>12</b> | GTVRISLVTKDPP      | 43,939             |
| <b>13</b> | LVTKDPPHRPHP       | 6,025              |
| <b>14</b> | GTVRISLVTKDP       | <b>205,800</b>     |
| <b>15</b> | VTKDPPHRPHP        | 6,681              |
| <b>16</b> | GTVRISLVTKD        | <b>194,346</b>     |
| <b>17</b> | TKDPPHRPHP         | 11,797             |
| <b>18</b> | GTVRISLVTK         | <b>207,007</b>     |
| <b>19</b> | KDPPHRPHP          | 4,225              |
| <b>20</b> | GTVRISLVT          | <b>116,165</b>     |
| <b>21</b> | DPPHRPHP           | 5,033              |
| <b>22</b> | GTVRISLV           | 86,789             |
| <b>23</b> | PPHRPHP            | 33,601             |
| <b>24</b> | GTVRISL            | <b>192,825</b>     |
| <b>25</b> | PHRPHP             | 43,456             |
| <b>26</b> | GTVRIS             | <b>182,383</b>     |

*Footnote S2: The signal intensities were measured using the macro "Protein Array Analyzer" from Image J. The measured values ranged between 204,526 and 4,225 and the threshold was set at 100,000 to determine the "binders" (highlighted in bold).*

**Table S3: Sequences of the substitutional analysis of the peptide RISLVTKDPPHR (spot 8 of Table S2) with the corresponding signal intensities.**

|   | wt             | A              | C              | D              | E              | F              | G              | H              | I              | K              | L              | M              | N              | P              | Q              | R              | S              | T              | V              | W              | Y              |
|---|----------------|----------------|----------------|----------------|----------------|----------------|----------------|----------------|----------------|----------------|----------------|----------------|----------------|----------------|----------------|----------------|----------------|----------------|----------------|----------------|----------------|
| R | 235,694        | 238,793        | 127,596        | 81,357         | 143,476        | 252,566        | 218,304        | 210,702        | 245,336        | 216,342        | 194,232        | 128,334        | 171,537        | 157,859        | 126,219        | 154,406        | 122,333        | 158,344        | 90,064         | 110,324        | 184,267        |
| I | 242,524        | 46,685         | 27,896         | 17,046         | 26,174         | <b>242,951</b> | 25,275         | 23,550         | <b>204,314</b> | 43,385         | 17,748         | 16,044         | 19,731         | 15,360         | 10,936         | 13,842         | 10,478         | 16,444         | 15,559         | 68,526         | <b>129,418</b> |
| S | 235,716        | <b>123,843</b> | <b>123,227</b> | 71,100         | <b>89,021</b>  | <b>209,297</b> | <b>111,795</b> | <b>187,921</b> | 78,403         | <b>220,393</b> | <b>142,432</b> | 70,405         | <b>93,854</b>  | 78,483         | 72,114         | <b>105,376</b> | <b>102,245</b> | <b>86,615</b>  | 38,457         | <b>172,503</b> | <b>150,337</b> |
| L | <b>243,425</b> | 28,959         | 44,334         | 11,339         | 26,688         | 260,094        | 20,286         | 31,299         | <b>179,375</b> | <b>110,969</b> | <b>226,036</b> | 9,736          | 17,562         | 8,541          | 12,514         | <b>209,074</b> | 15,296         | 13,114         | 15,206         | 60,065         | <b>135,667</b> |
| V | <b>244,267</b> | <b>134,552</b> | <b>172,798</b> | 10,142         | 13,000         | <b>259,269</b> | <b>125,566</b> | <b>179,689</b> | <b>248,441</b> | <b>254,221</b> | <b>250,285</b> | 36,639         | 63,527         | 16,086         | 53,417         | <b>258,955</b> | <b>139,077</b> | <b>82,823</b>  | 78,421         | <b>96,252</b>  | <b>181,625</b> |
| T | <b>254,778</b> | <b>205,268</b> | <b>191,761</b> | 11,308         | 10,639         | <b>258,321</b> | <b>91,170</b>  | <b>106,881</b> | <b>182,493</b> | <b>223,221</b> | <b>260,069</b> | 72,480         | 72,196         | <b>91,405</b>  | <b>109,130</b> | <b>258,088</b> | <b>200,616</b> | <b>135,333</b> | <b>159,581</b> | <b>163,355</b> | <b>244,860</b> |
| K | <b>240,018</b> | 38,075         | 22,201         | 9,066          | 10,797         | <b>157,916</b> | 22,005         | 33,255         | 49,542         | <b>82,786</b>  | 60,762         | 10,835         | 17,957         | 9,634          | 12,576         | <b>220,024</b> | 33,964         | 19,729         | 33,258         | 62,804         | <b>81,459</b>  |
| D | <b>257,412</b> | <b>256,119</b> | <b>248,841</b> | <b>190,846</b> | <b>194,358</b> | <b>259,774</b> | <b>256,060</b> | <b>242,065</b> | <b>245,766</b> | <b>253,495</b> | <b>239,364</b> | <b>159,748</b> | <b>183,109</b> | <b>226,288</b> | <b>233,417</b> | <b>259,525</b> | <b>254,240</b> | <b>245,975</b> | <b>248,769</b> | <b>207,670</b> | <b>254,179</b> |
| P | <b>234,015</b> | <b>228,093</b> | <b>121,136</b> | 38,385         | 29,194         | <b>252,090</b> | <b>131,070</b> | <b>123,348</b> | <b>101,715</b> | <b>199,670</b> | <b>135,333</b> | 47,964         | <b>179,302</b> | <b>80,982</b>  | <b>129,163</b> | <b>233,743</b> | <b>108,972</b> | 75,663         | <b>84,584</b>  | <b>158,776</b> | <b>210,525</b> |
| P | <b>219,612</b> | <b>242,816</b> | <b>205,163</b> | 36,369         | 33,192         | <b>243,331</b> | <b>185,362</b> | <b>144,490</b> | <b>152,488</b> | <b>182,055</b> | <b>147,196</b> | 63,585         | <b>163,300</b> | <b>91,793</b>  | <b>87,004</b>  | <b>227,875</b> | <b>138,821</b> | <b>122,769</b> | <b>84,888</b>  | <b>124,651</b> | <b>180,037</b> |
| H | <b>223,624</b> | <b>208,702</b> | <b>105,009</b> | 23,814         | 23,697         | <b>199,377</b> | <b>143,658</b> | <b>136,995</b> | <b>111,858</b> | <b>192,353</b> | <b>133,839</b> | 61,440         | <b>110,257</b> | 63,207         | 56,630         | <b>186,130</b> | <b>105,542</b> | <b>98,069</b>  | <b>91,735</b>  | <b>123,222</b> | <b>149,297</b> |
| R | <b>226,039</b> | 19,320         | 7,395          | 4,734          | 4,433          | 39,435         | 9,010          | 6,676          | 8,293          | 56,485         | 11,461         | 6,409          | 7,060          | 6,272          | 7,271          | <b>101,766</b> | 12,050         | 11,200         | 8,708          | 11,783         | 33,087         |

*Footnote S3: The signal intensities were measured using the macro "Protein Array Analyzer" from Image J. The measured values ranged between 260,094 and 4,433, and the threshold was set at 80,000 to determine the "binders" (highlighted in bold). In yellow are highlighted the key amino acid positions of the peptide RISLVTKDPPHR tolerating only several replacements (not more than 5).*
